# Supplementary material for: Mosaic cis-regulatory evolution drives transcriptional partitioning of HERVH endogenous retrovirus in the human embryo
Source: PubMed Central journal article supplement (PMC8912925; doi:10.7554/elife.76257), 2022-02-18

# 7bc Family Motif Enrichment

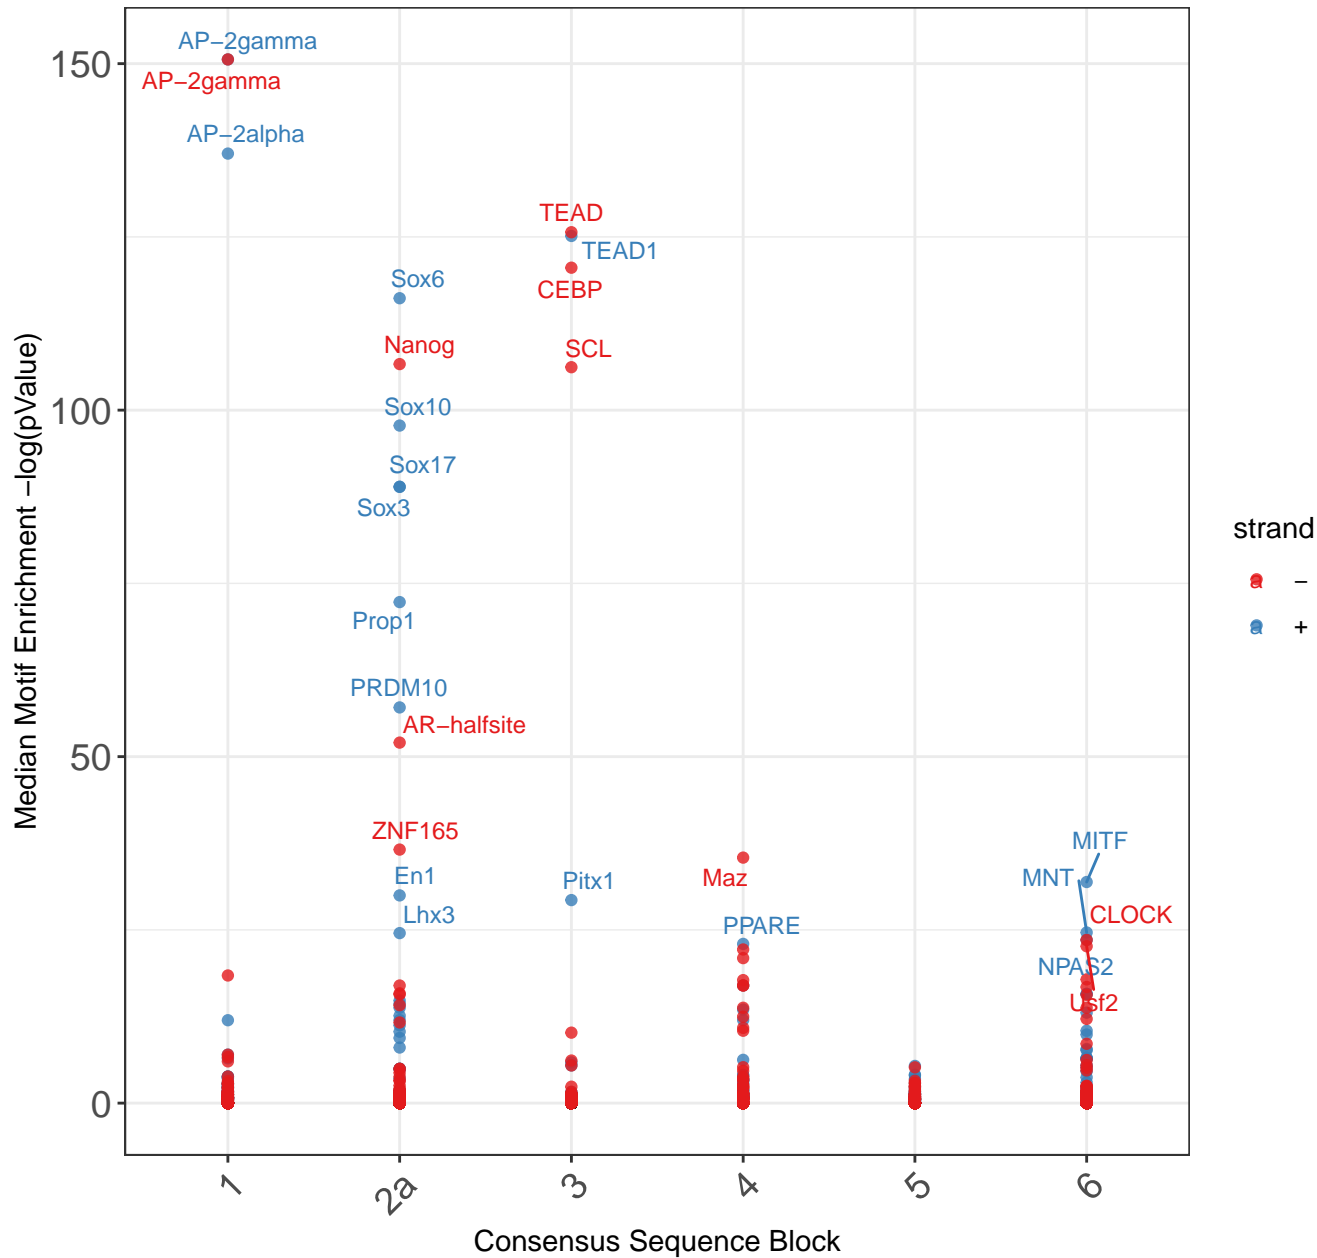

# 7d1 Family Motif Enrichment

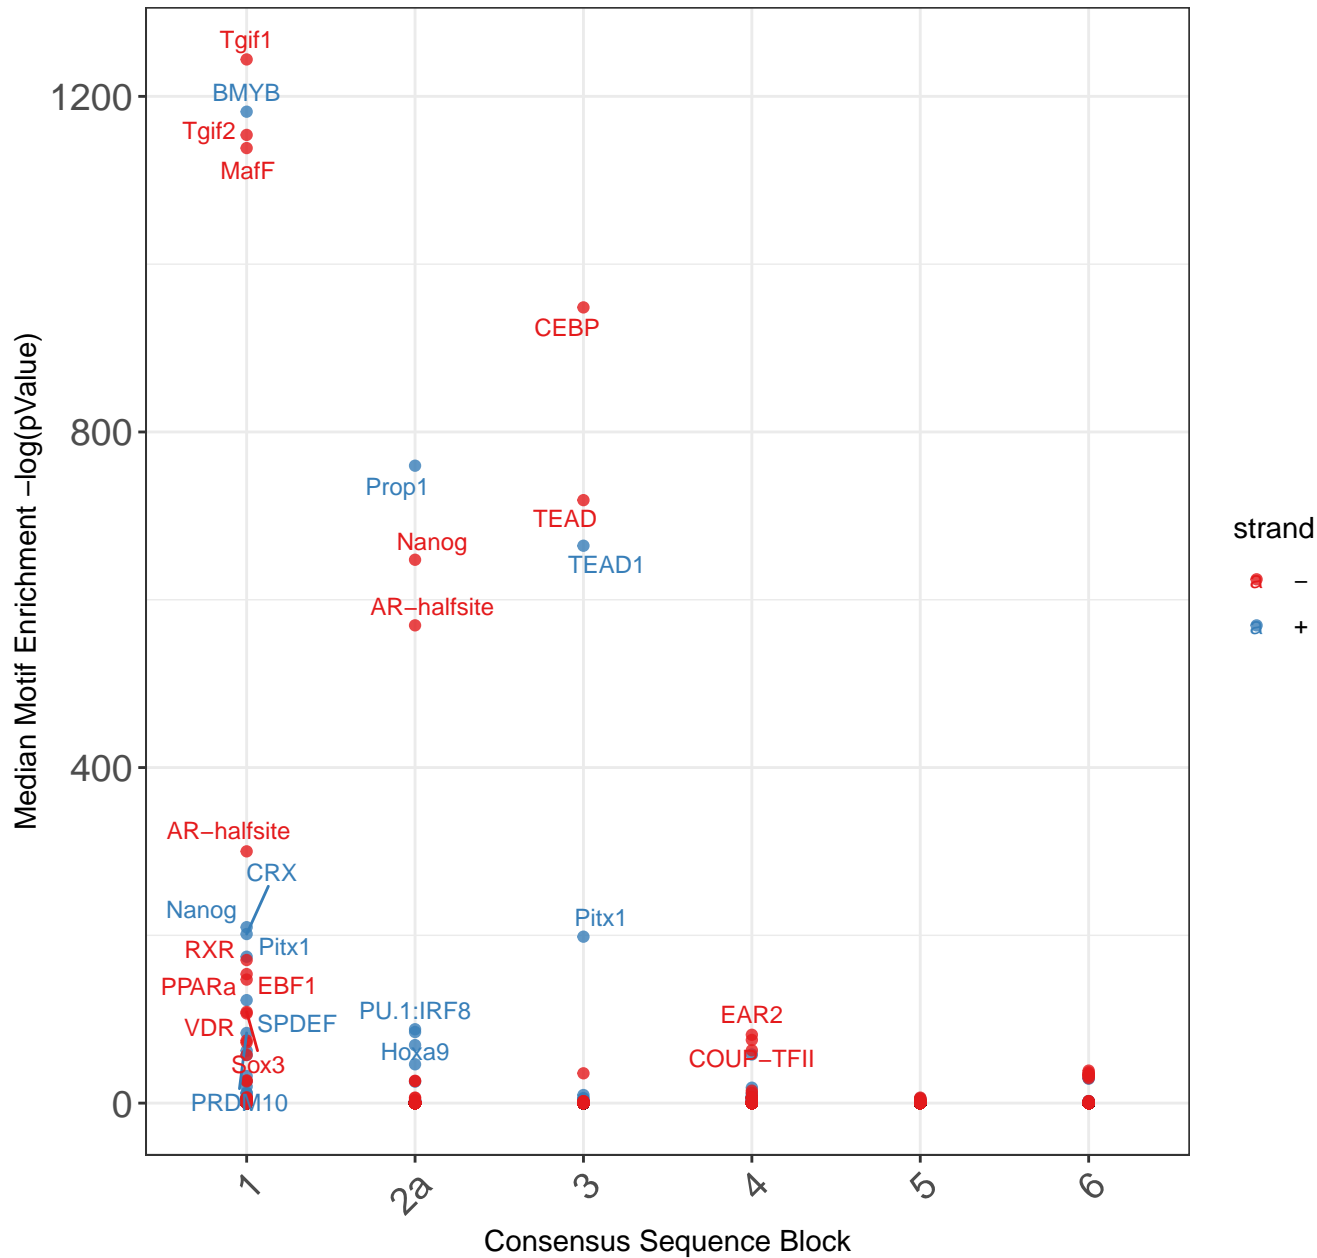

# 7d2 Family Motif Enrichment

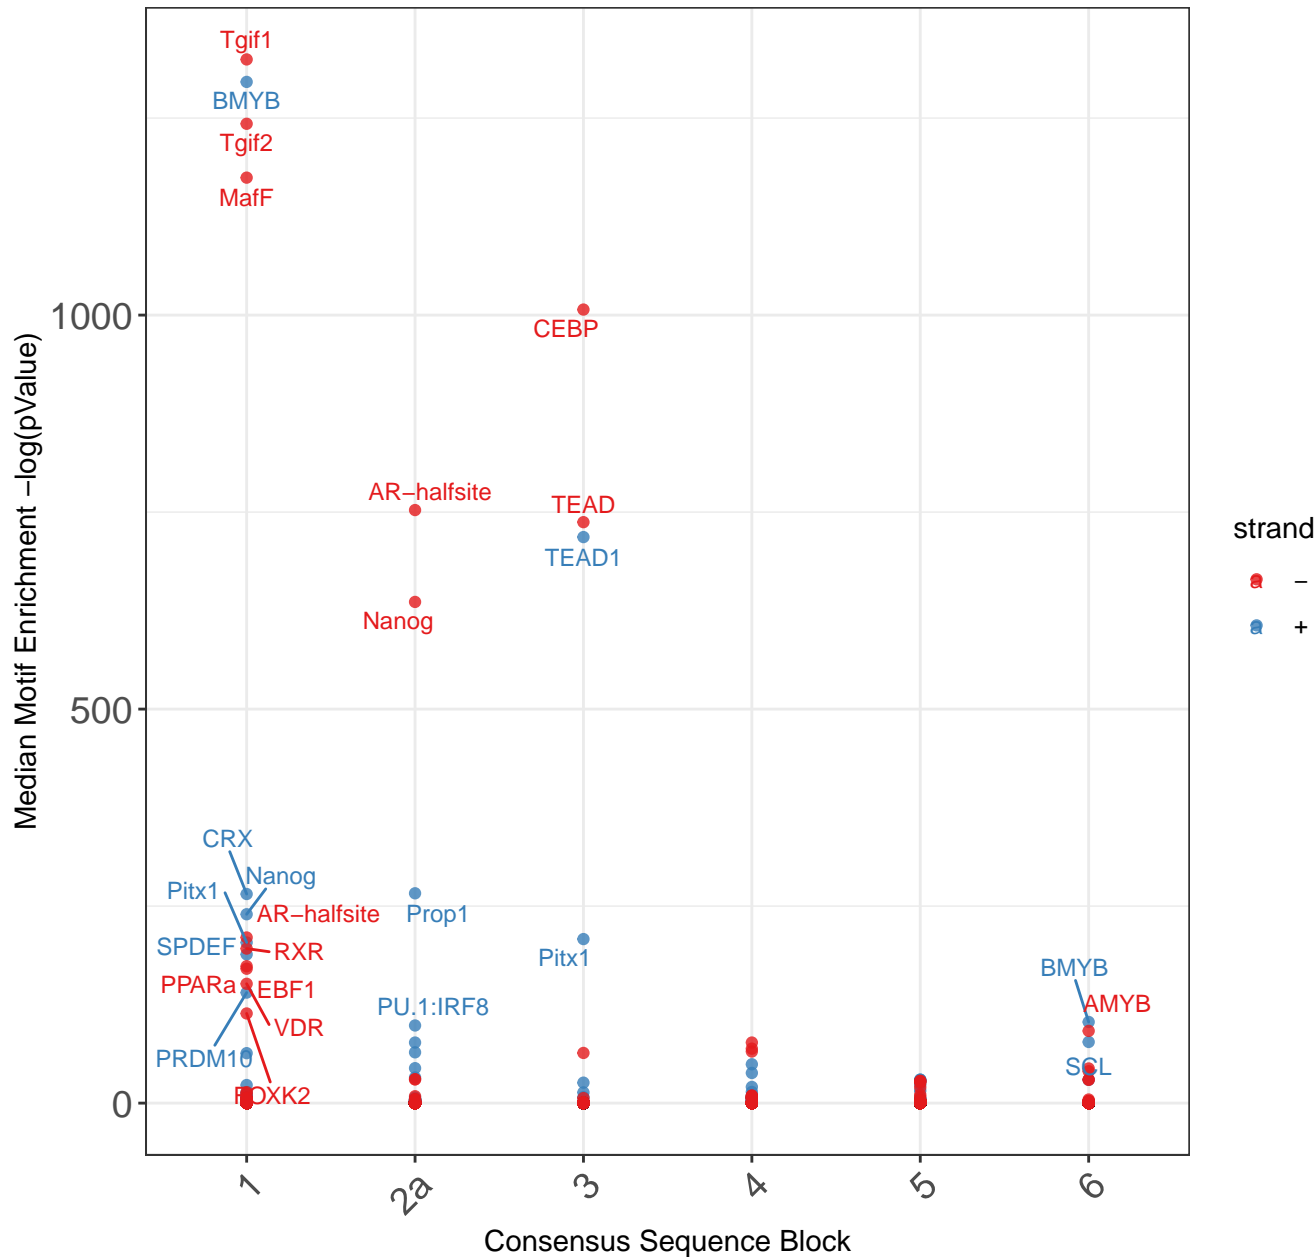

# 7o Family Motif Enrichment

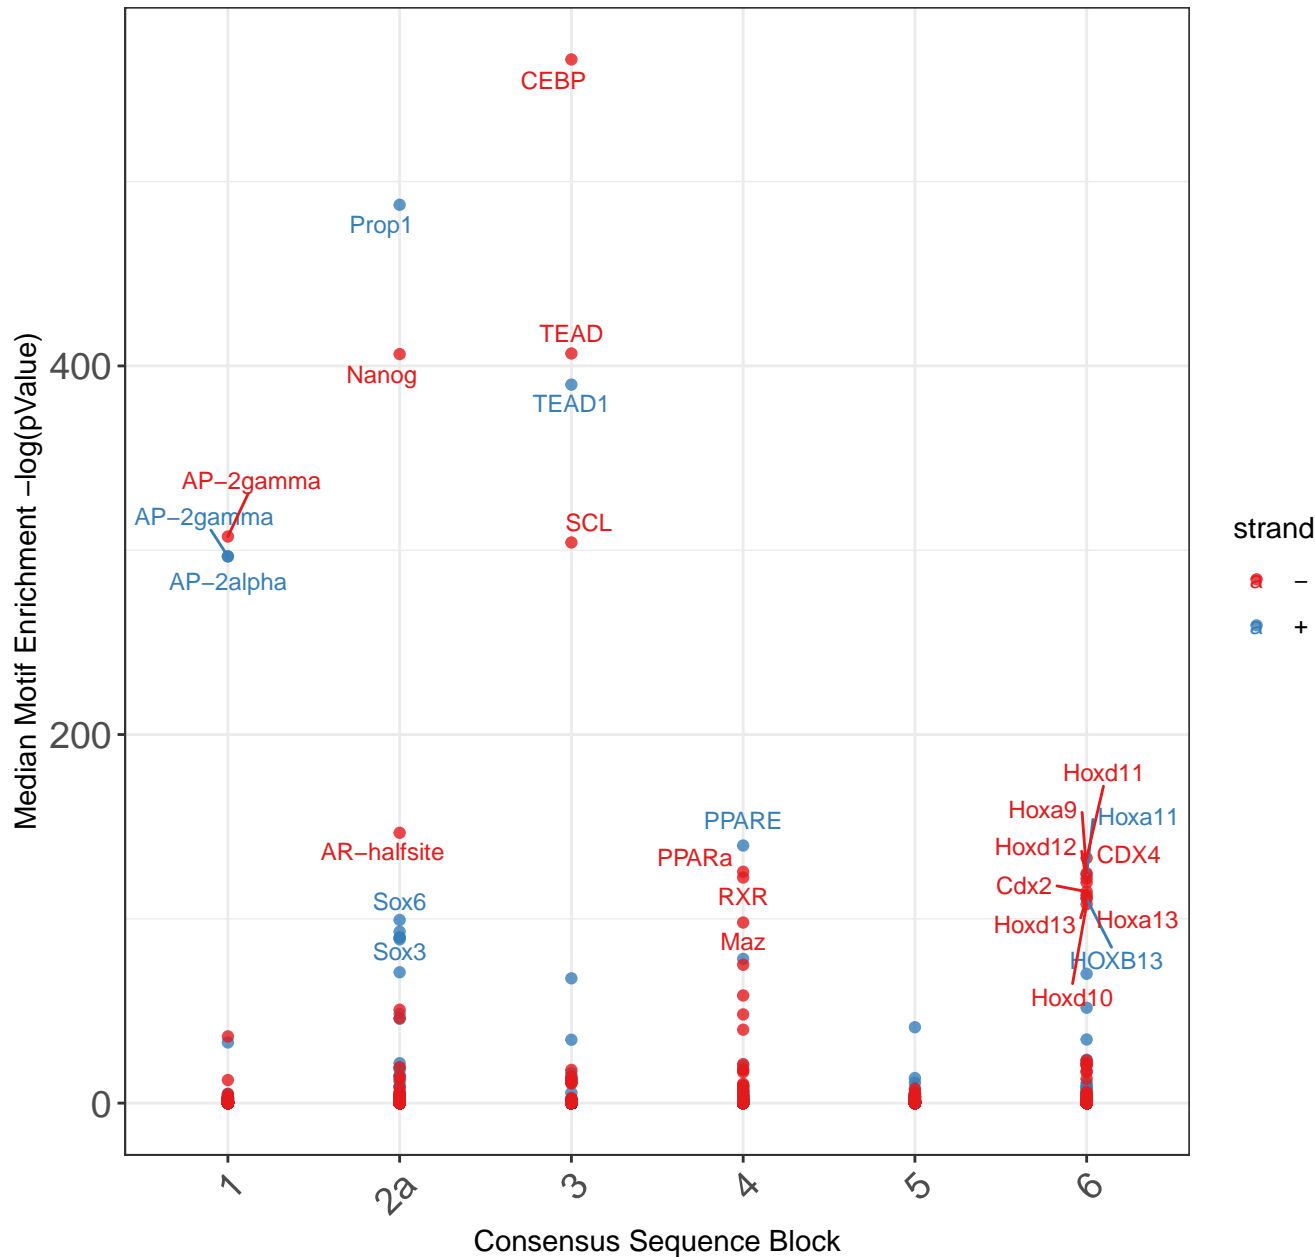

# 7u1 Family Motif Enrichment

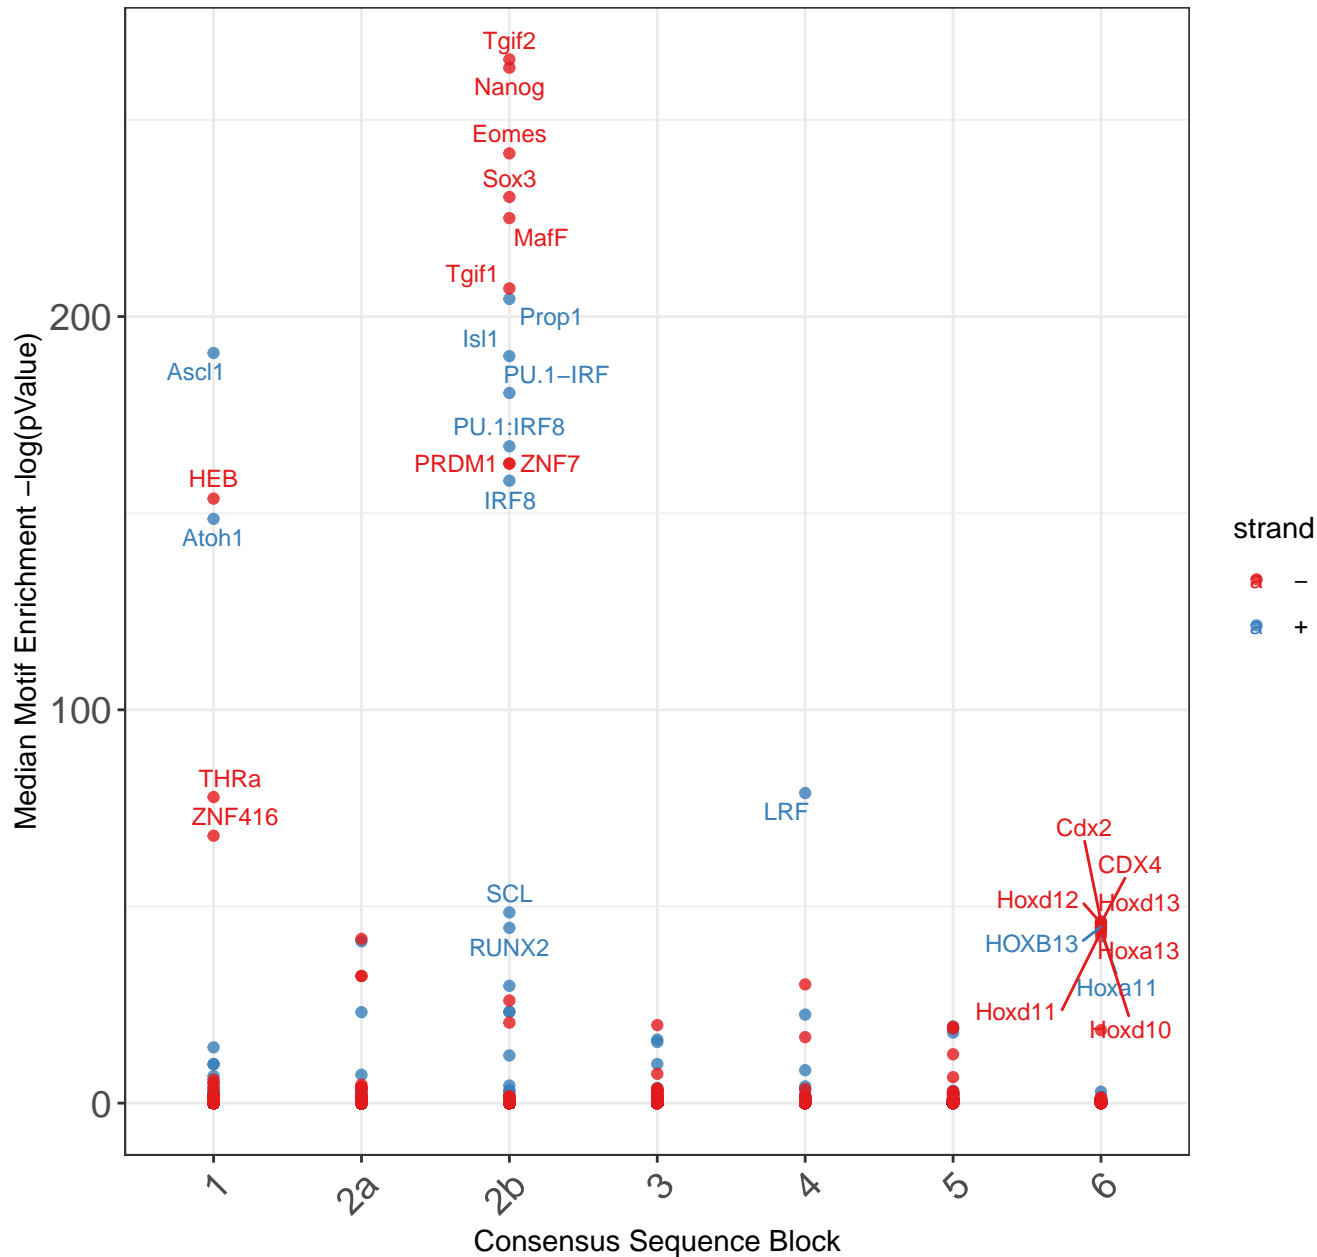

# 7u2 Family Motif Enrichment

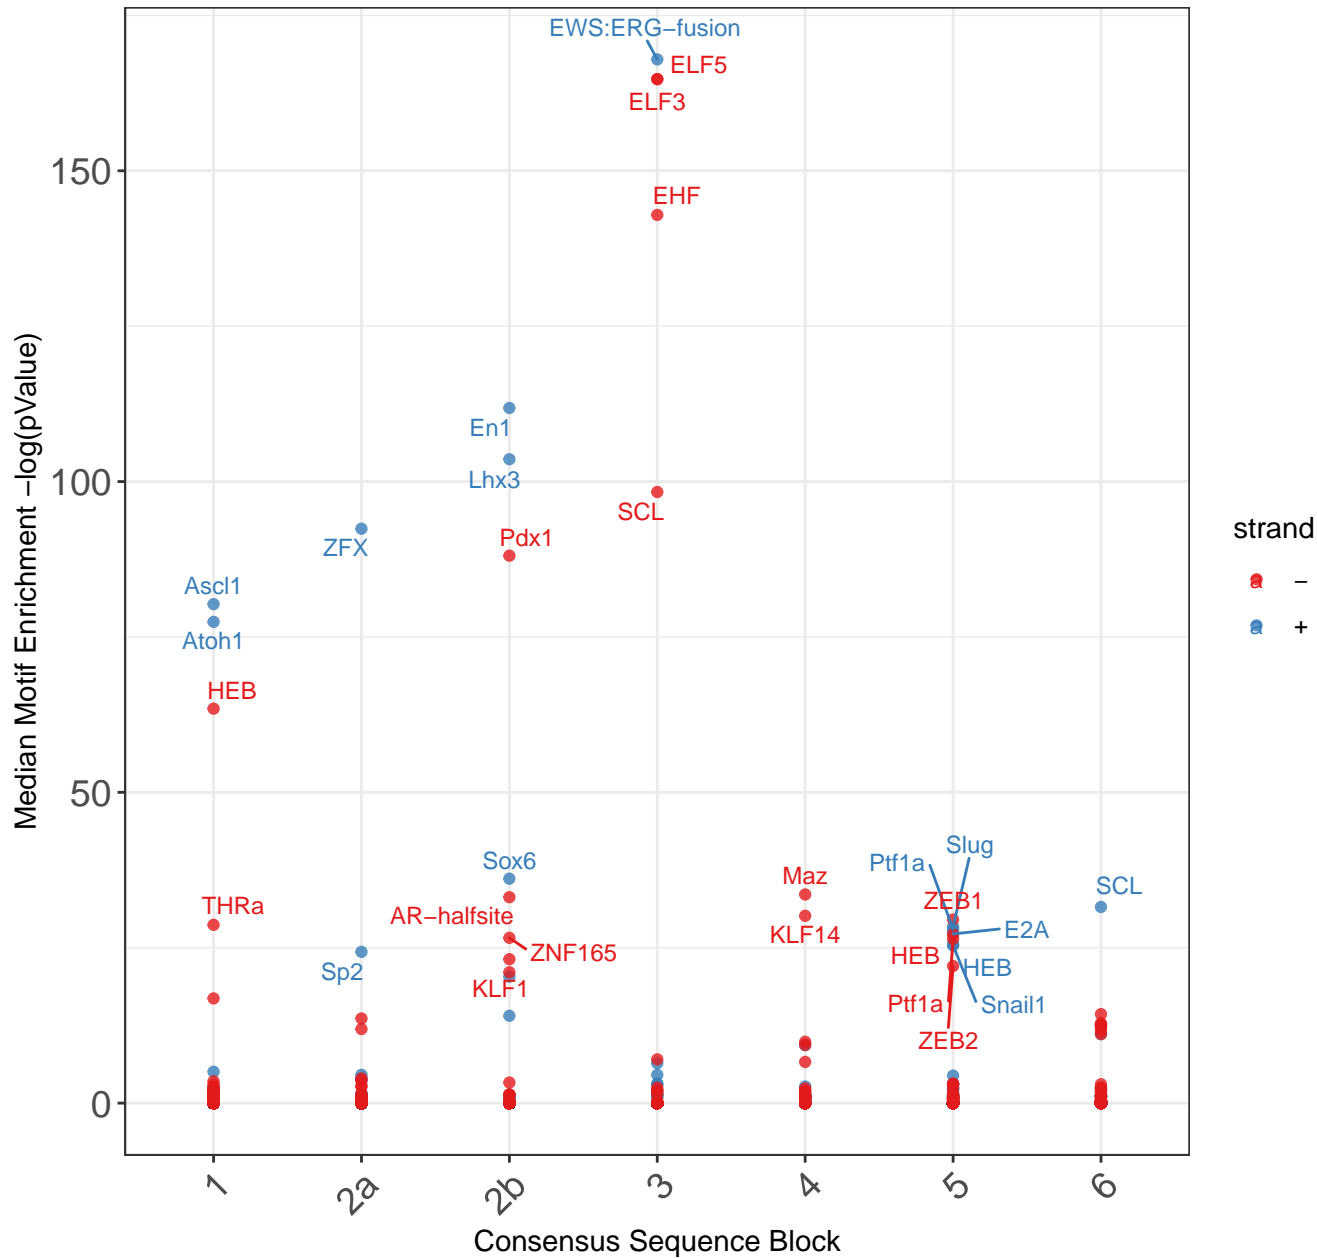



# 7up2 Family Motif Enrichment

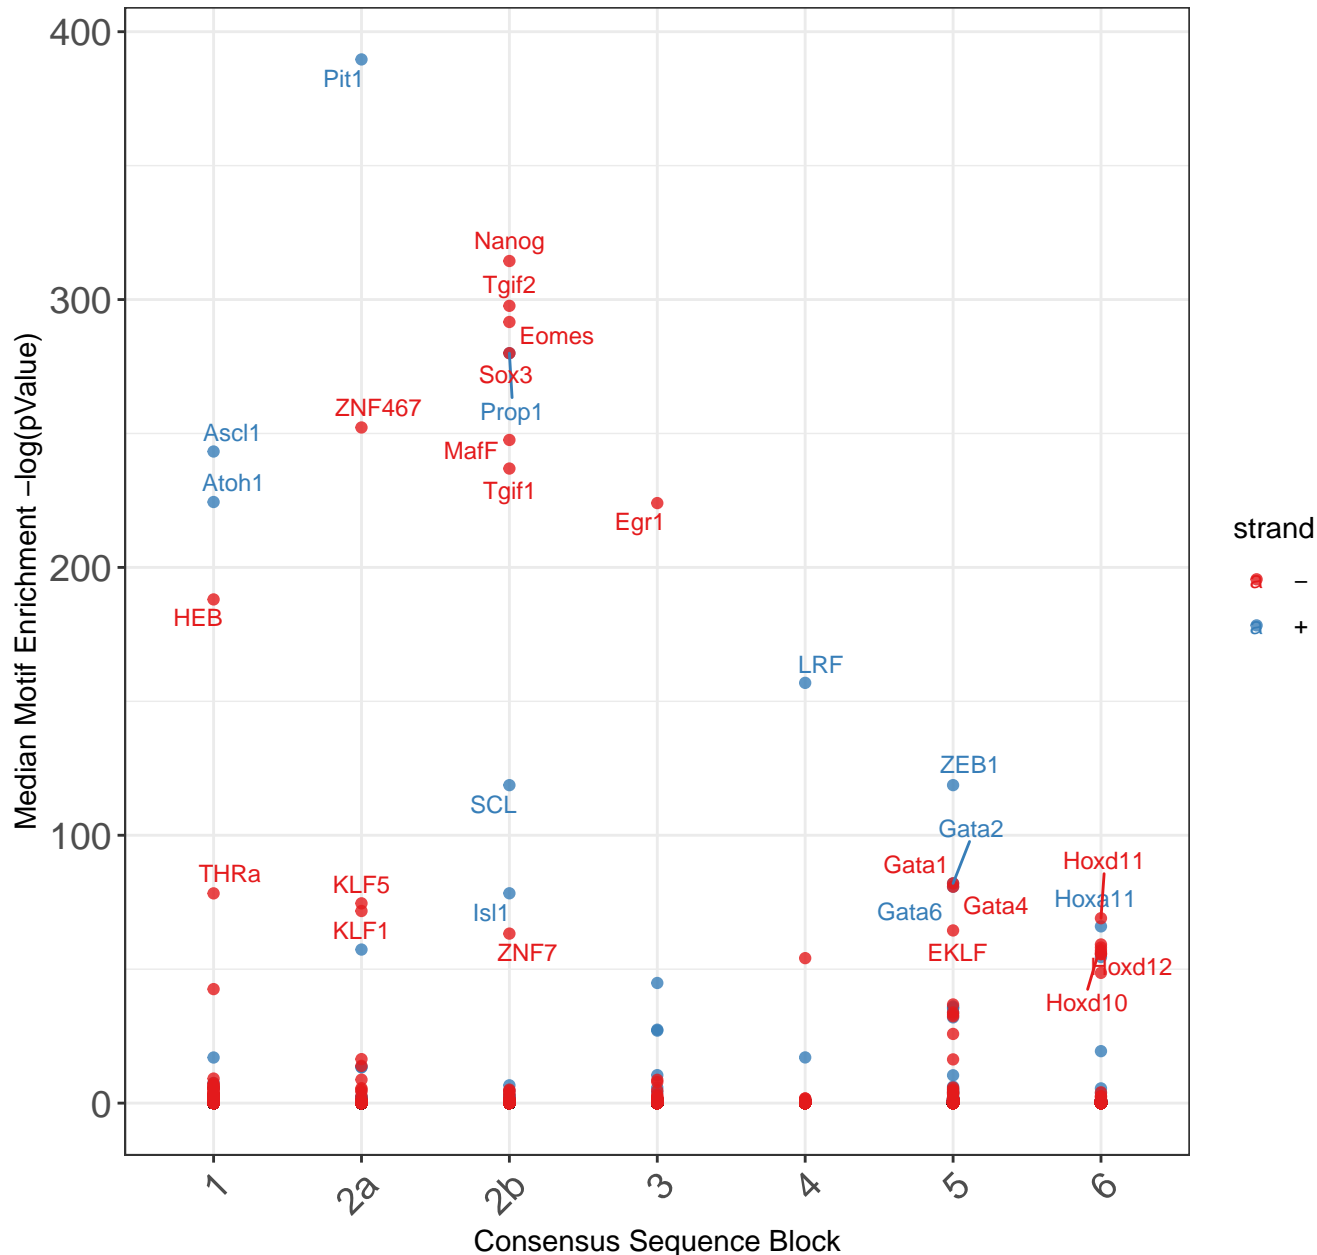



# LTR7B Family Motif Enrichment

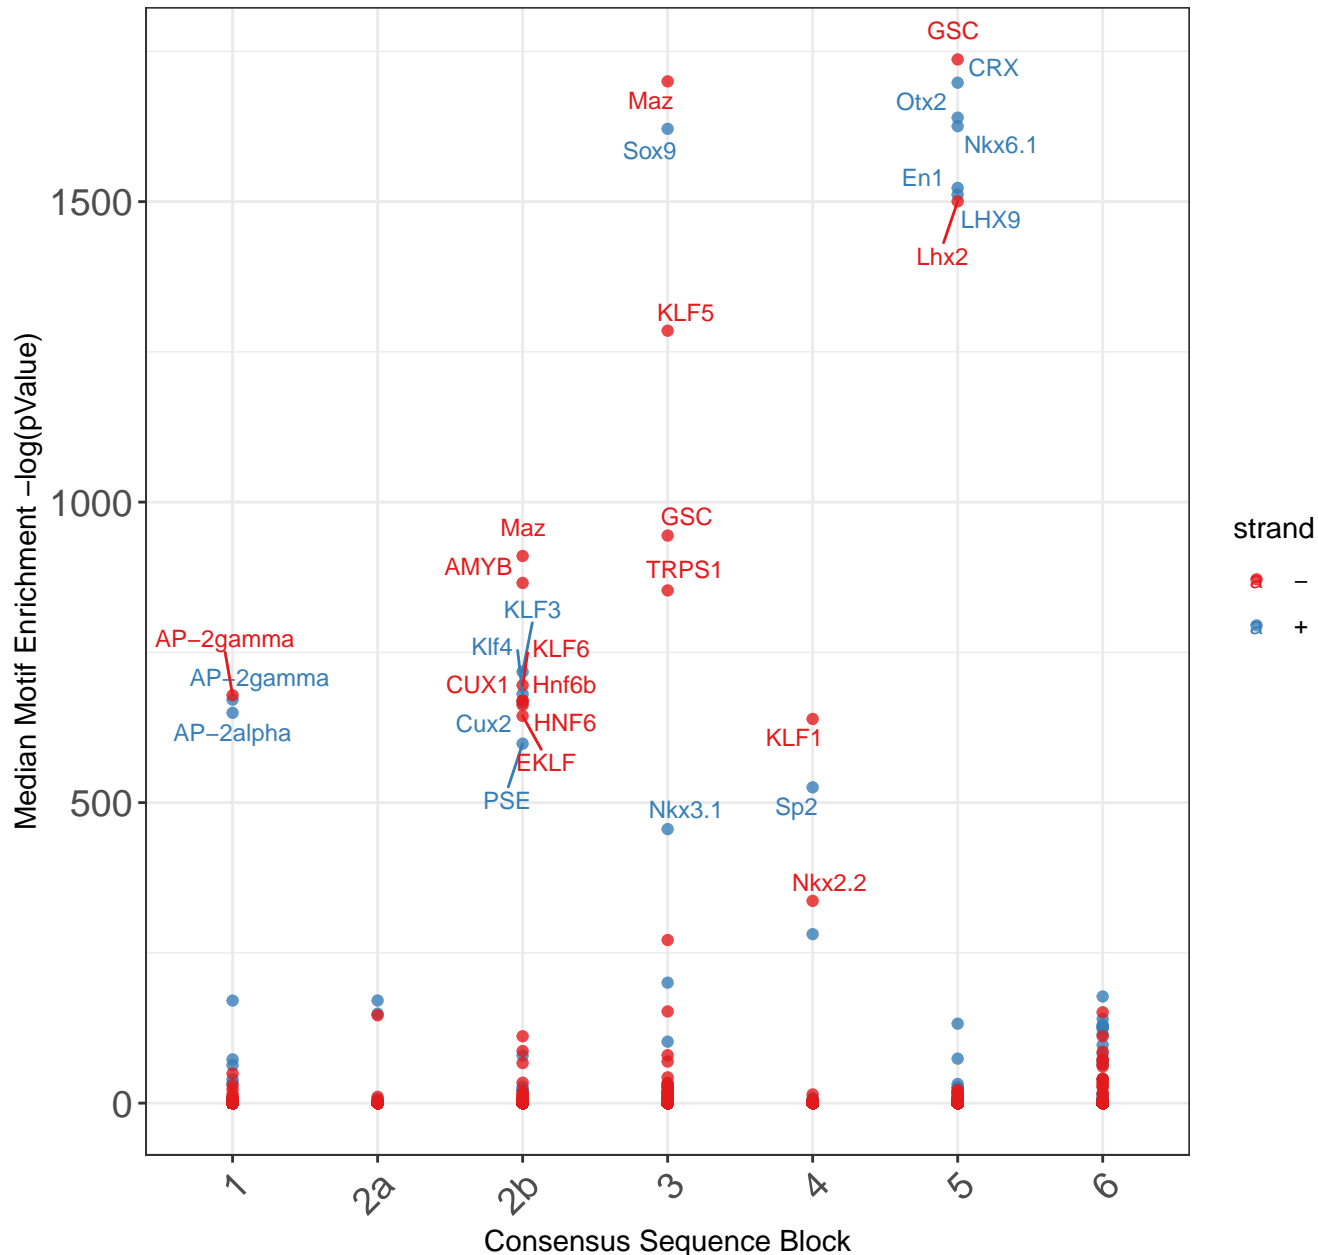

# LTR7C Family Motif Enrichment

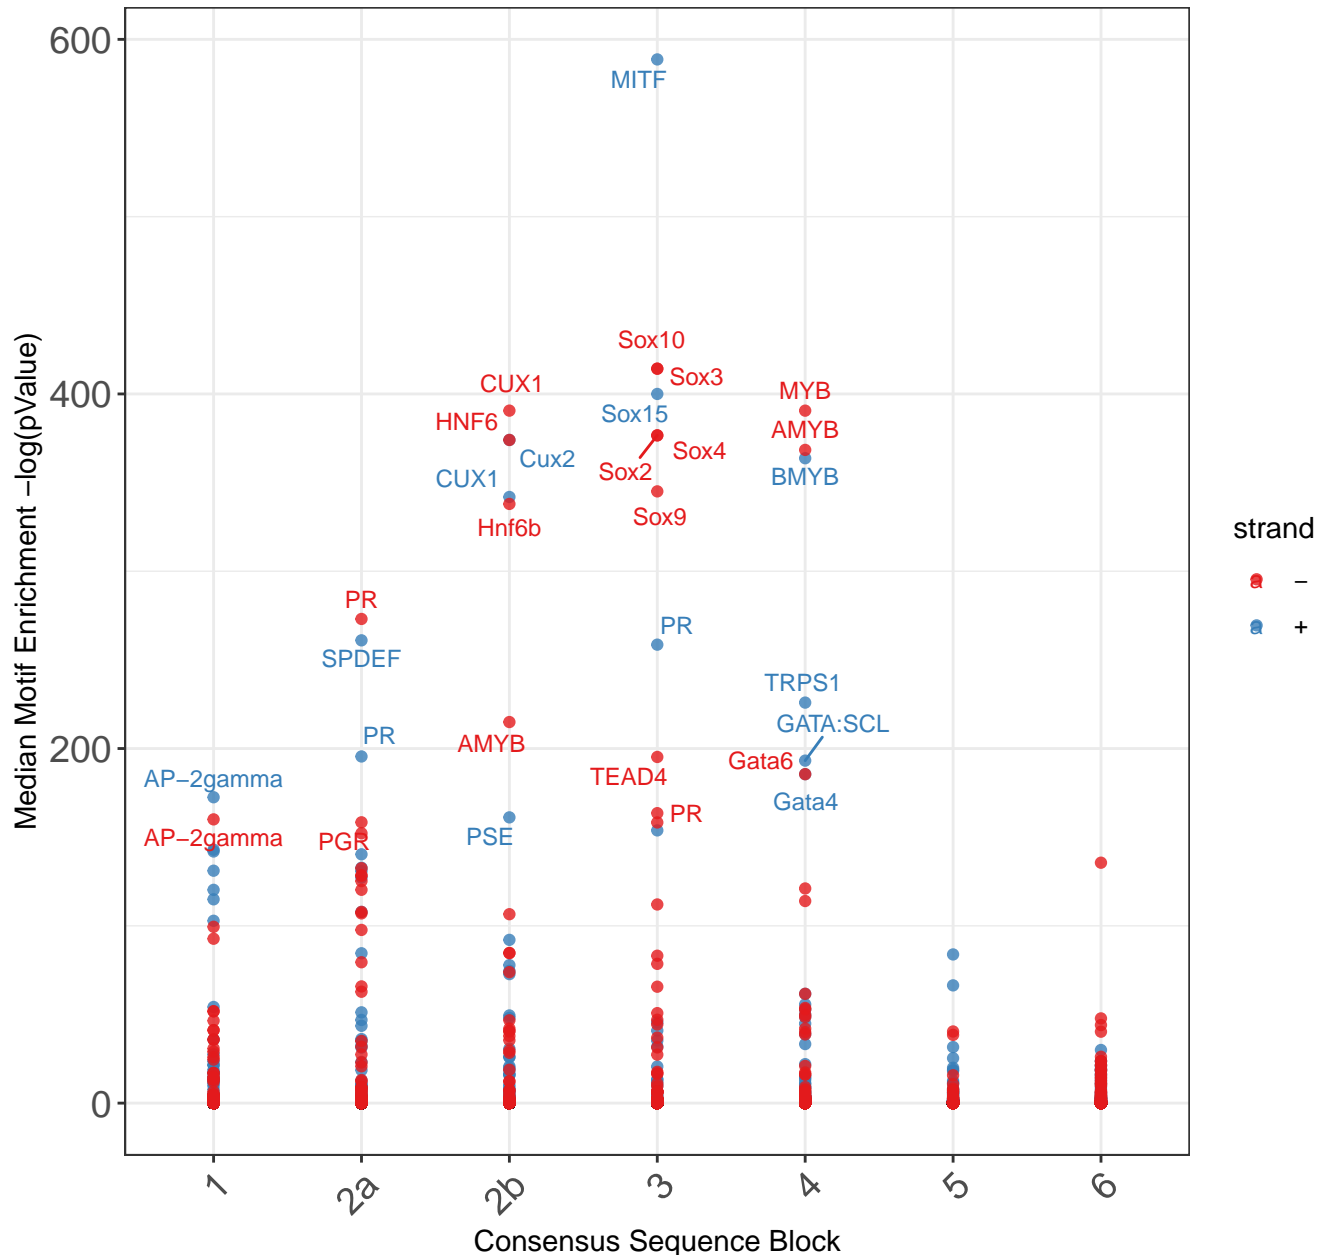

# LTR7Y Family Motif Enrichment

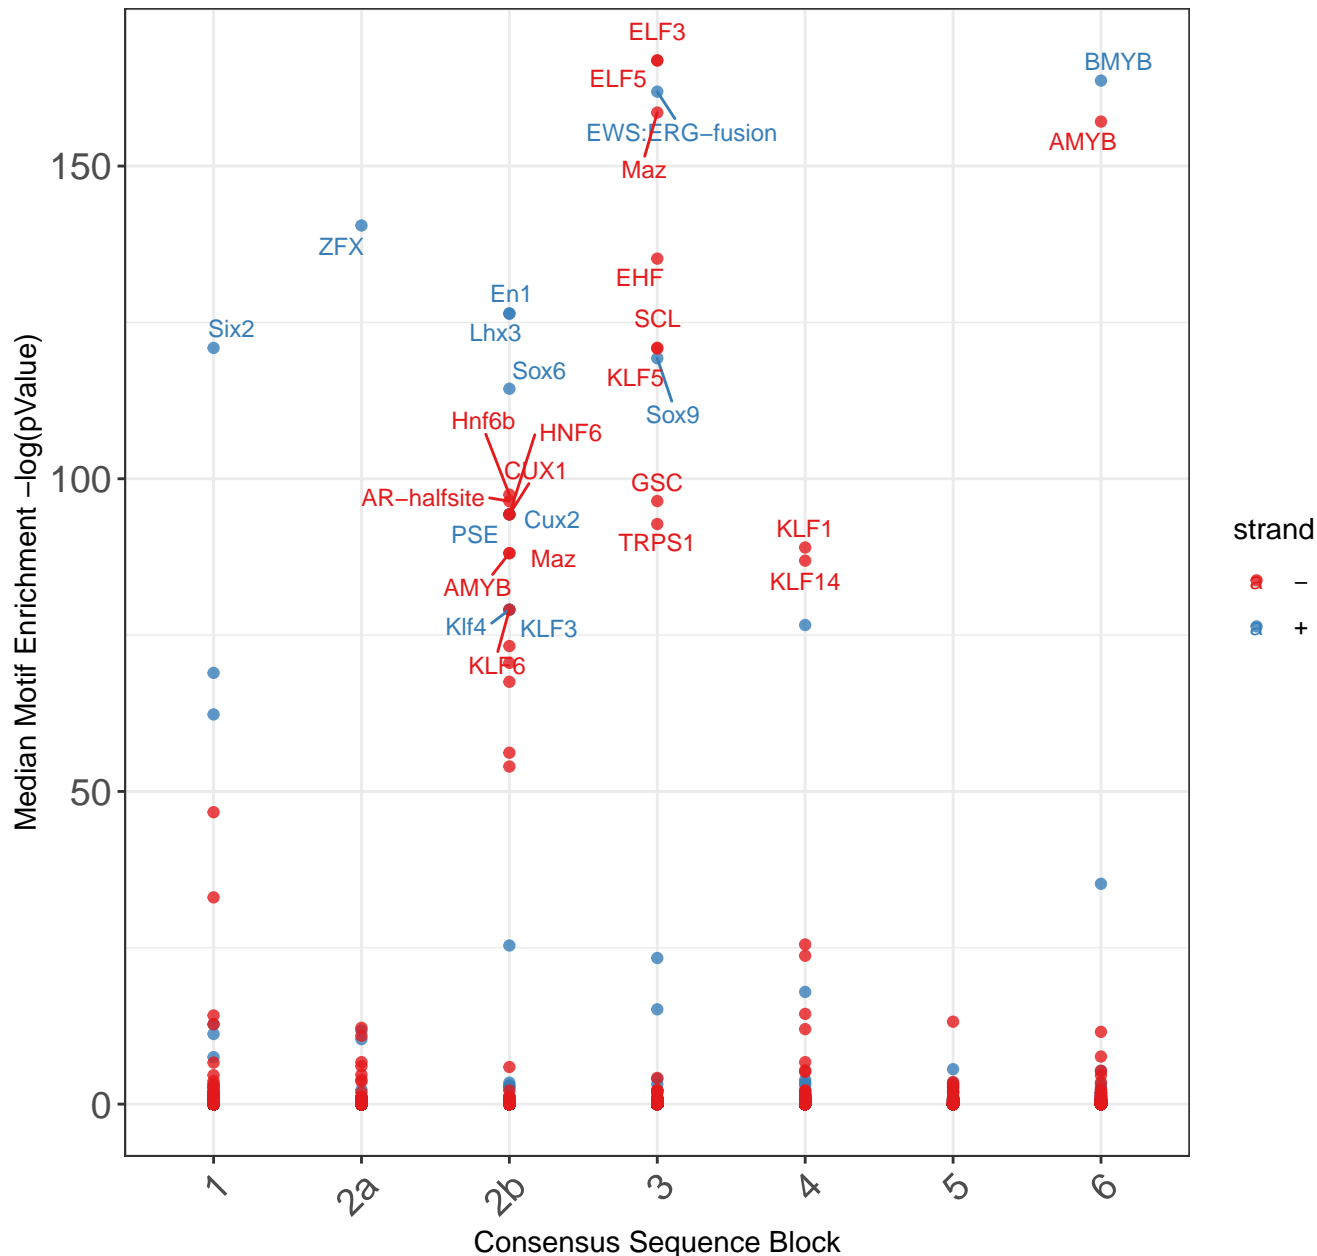

Supplement: elife-76257-supp4.pdf [file elife-76257-supp4.pdf]
